# Supplementary material for: Thermally Stable Magneto-Plasmonic Nanoparticles for SERS with Tunable Plasmon Resonance
Source: Nanomaterials (Basel). 2022 Aug 19;12(16):2860. doi: 10.3390/nano12162860 (PMC9416134; doi:10.3390/nano12162860)
Supplement: Supplementary file 1 [file nanomaterials-12-02860-s001.zip › nanomaterials-1866484-supplementary.pdf]

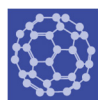

# Thermally Stable Magneto-Plasmonic Nanoparticles for SERS with Tunable Plasmon Resonance

Lina Mikoliunaite <sup>1,2</sup>, Martynas Talaikis <sup>1</sup>, Aleksandra Michalowska <sup>3</sup>, Jorunas Dobilas <sup>4</sup>, Voitech Stankevicius <sup>4</sup>, Andrzej Kudelski <sup>3</sup> and Gediminas Niaura <sup>1,\*</sup>

<sup>1</sup> Department of Organic Chemistry, Center for Physical Sciences and Technology (FTMC), Sauletekio av. 3, LT-10257 Vilnius, Lithuania

<sup>2</sup> Department of Physical Chemistry, Faculty of Chemistry and Geosciences, Vilnius University, Naugarduko st. 24, LT-03225 Vilnius, Lithuania

<sup>3</sup> Faculty of Chemistry, University of Warsaw, Pasteura st. 1, 02-093 Warsaw, Poland

<sup>4</sup> Department of Functional Materials and Electronics, Center for Physical Sciences and Technology (FTMC), Sauletekio al. 3, LT-10257 Vilnius, Lithuania

\* Correspondence: gediminas.niaura@ftmc.lt

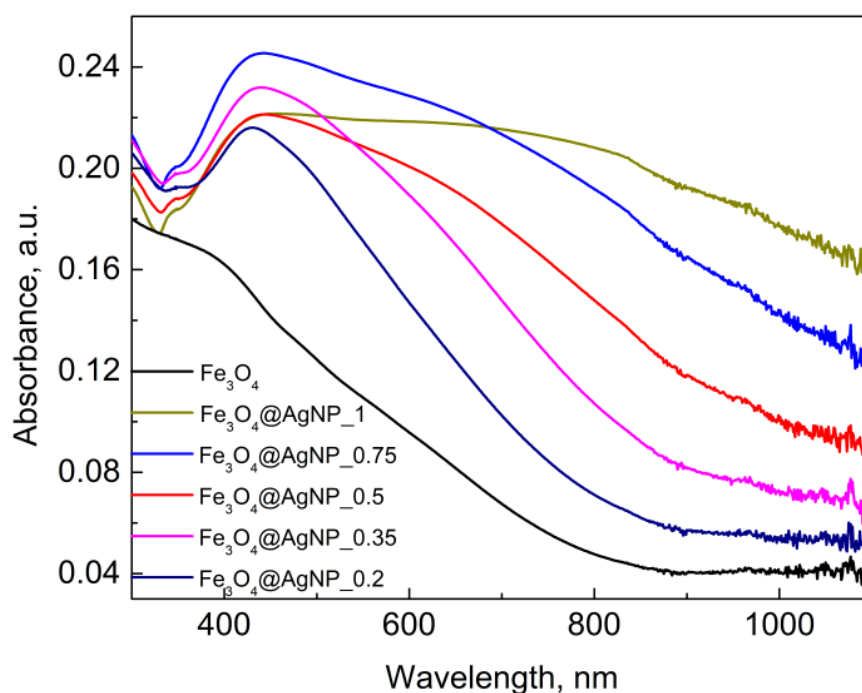

**Figure S1.** Absorption spectra of all prepared samples: magnetite (black), magnetite decorated with various amount of silver nanoparticles: 100% (dark yellow), 75% (blue), 50% (red), 35% (magenta), and 20% (dark blue).

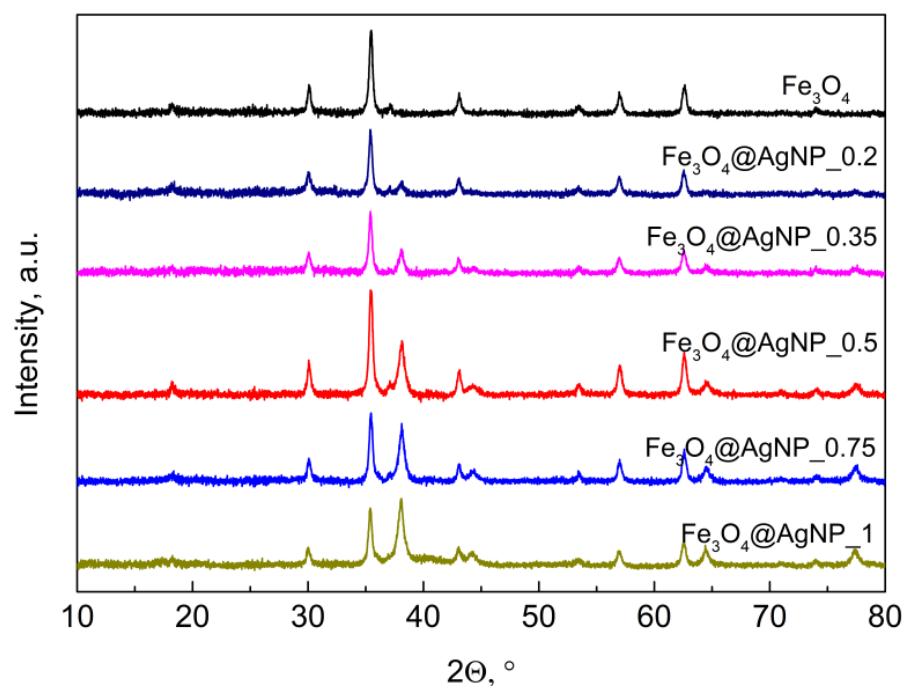

**Figure S2.** XRD diffractograms of all prepared samples: magnetite (black), magnetite decorated with various amount of silver nanoparticles: 100% (dark yellow), 75% (blue), 50% (red), 35% (magenta), and 20% (dark blue).

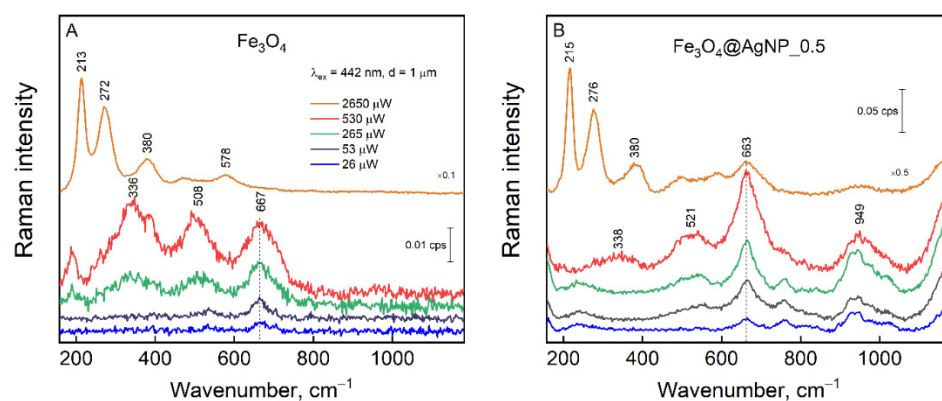

**Figure S3.** Raman spectra of (A) magnetite nanoparticles and (B) composite magnetite-silver nanoparticles ( $\text{Fe}_3\text{O}_4@\text{AgNP}_0.5$ ) at varied laser powers from 0.026 mW to 2.65 mW. The 442 nm laser radiation was focused to a spot of 1  $\mu\text{m}$  in diameter on the dried nanoparticle samples.

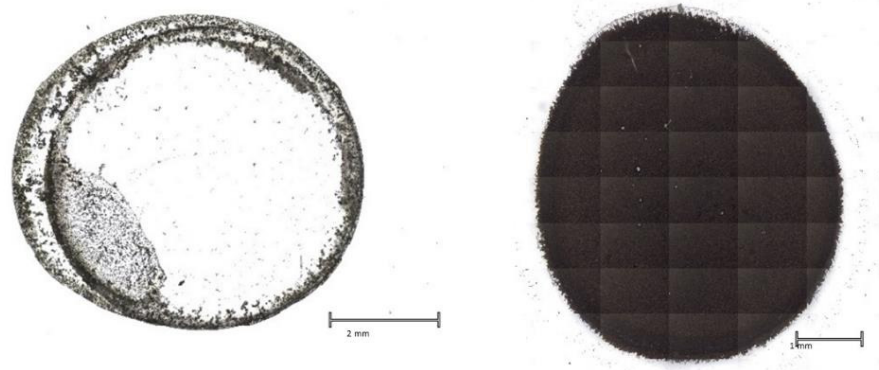

**Figure S4.** Microscope images of AgNPs (left) and  $\text{Fe}_3\text{O}_4@\text{AgNP}_0.5$  (right) drops dried on a glass slide.  $\text{Fe}_3\text{O}_4@\text{AgNP}_0.5$  was dried under strong magnetic field.
